# Supplementary material for: Documents, reanalysis, and global circulation models: a new method for reconstructing historical climate focusing on present-day inland Tanzania, 1856–1890
Source: Copernicus journal article supplement (doi:10.5194/cp-20-2701-2024), 2024-12-12

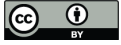

*Supplement of*

**Documents, reanalysis, and global circulation models: a new method for reconstructing historical climate focusing on present-day inland Tanzania, 1856–1890**

**Philip Gooding et al.**

*Correspondence to:* Philip Gooding ([philip.gooding@mcgill.ca](mailto:philip.gooding@mcgill.ca)) and Melissa J. Lazenby ([m.lazenby@sussex.ac.uk](mailto:m.lazenby@sussex.ac.uk))

The copyright of individual parts of the supplement might differ from the article licence.

Figure S1. CMIP5 panel plot for 25 individual models indicating Mpwapwa's rainfall anomalies for DJFMA from 1856-57–1889-90. Model titles are embedded within each individual plot.

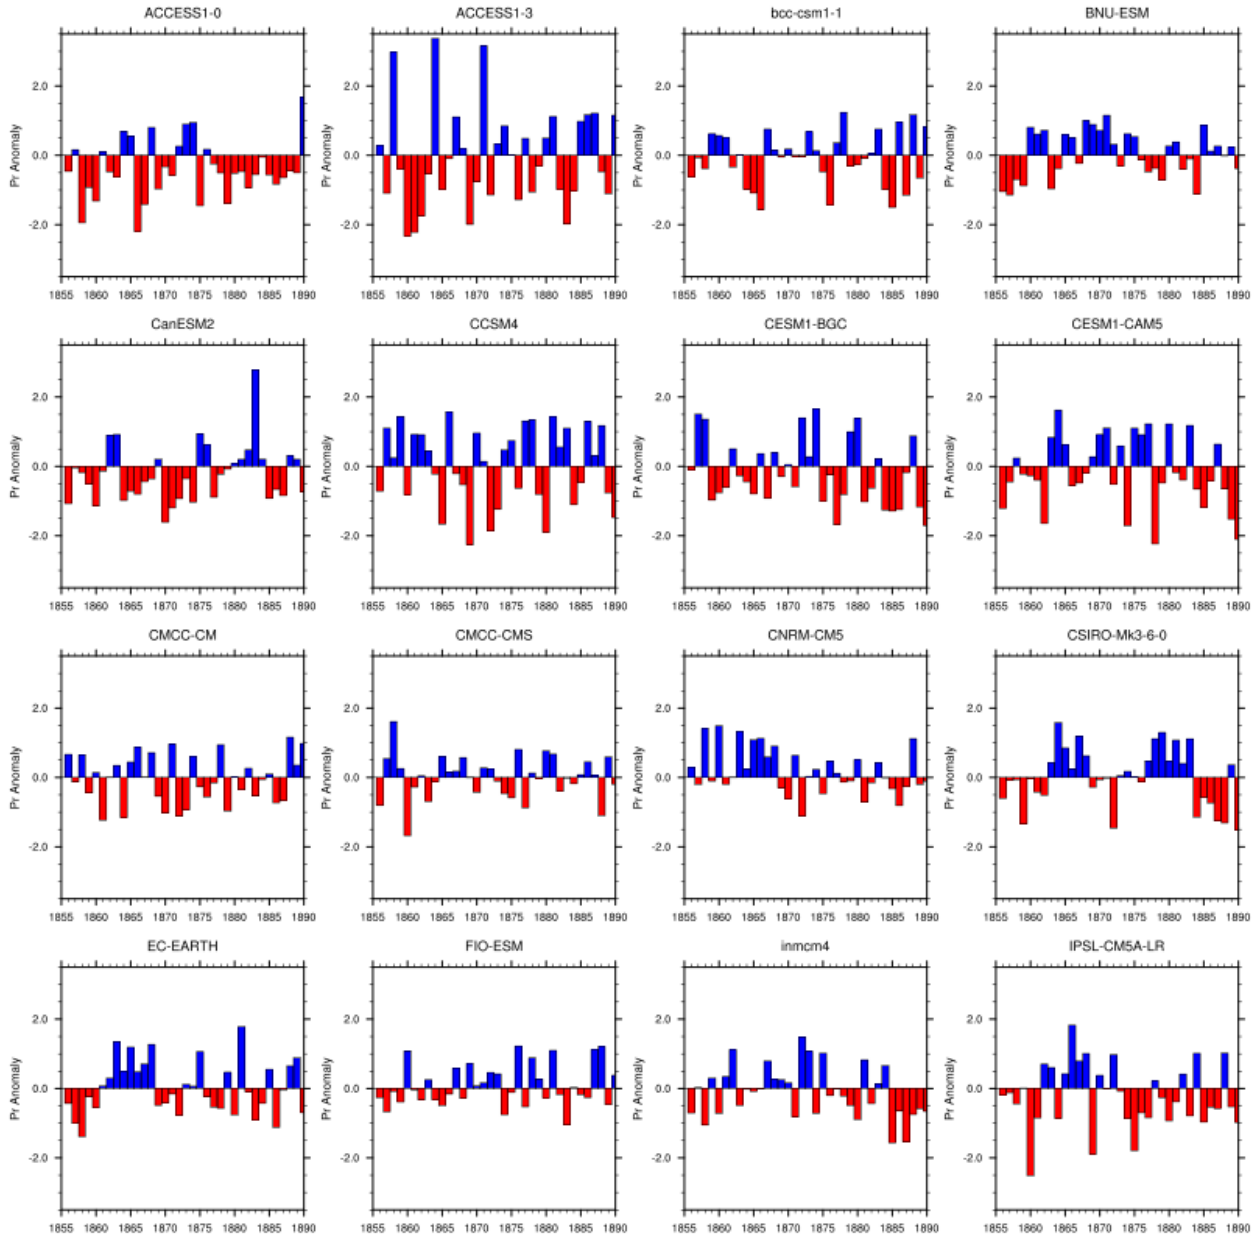

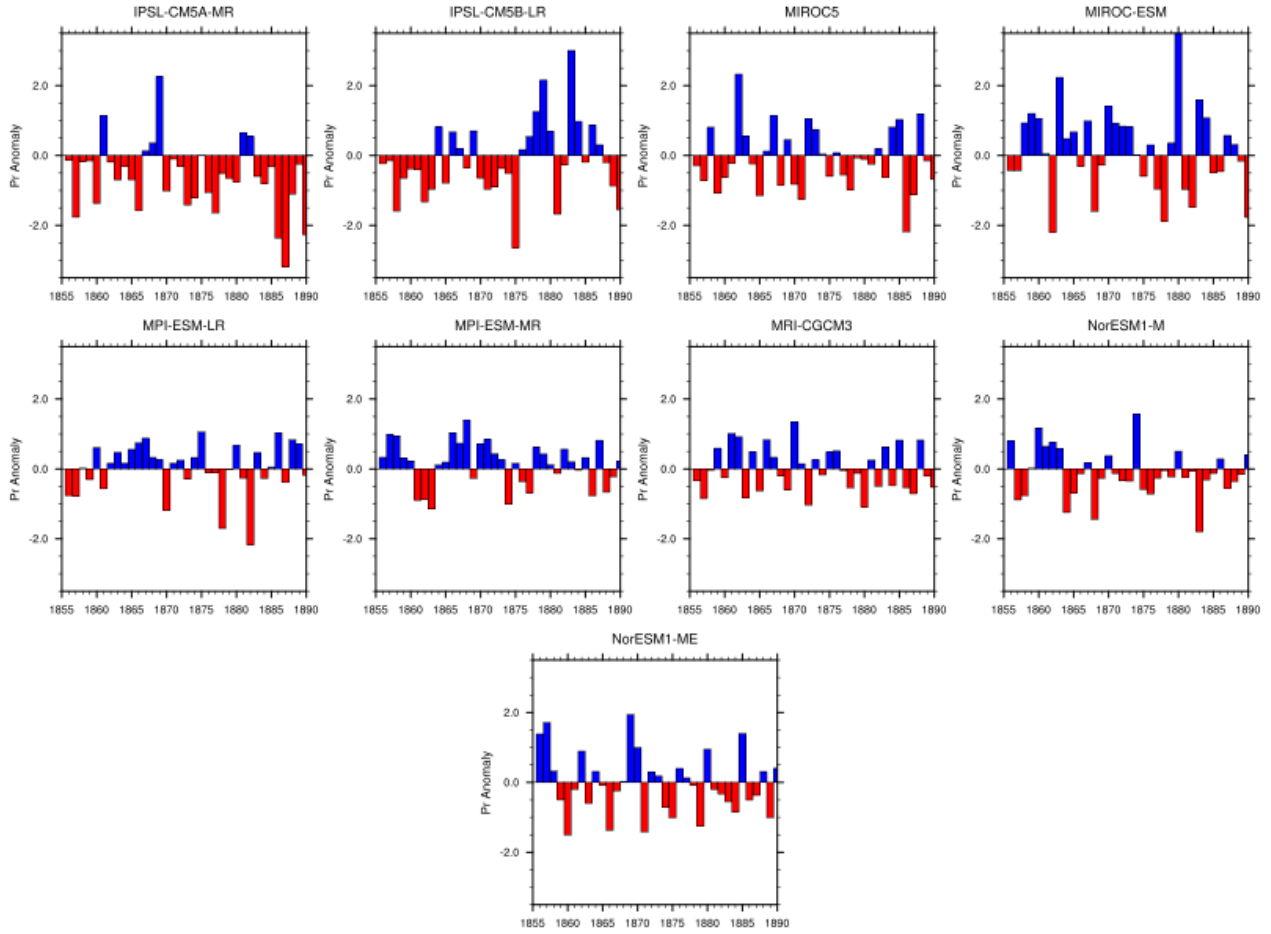

Supplement: Supplementary file 1 [file cp-20-2701-2024-supplement.pdf]
